# Supplementary material for: The emergence of spiraling tracheary element bundles in incompatible grafts
Source: PeerJ. 2022 Sep 14;10:e14020. doi: 10.7717/peerj.14020 (PMC9482358; doi:10.7717/peerj.14020)
Supplement: Supplemental Information 1 [file peerj-10-14020-s001.xlsx]

## Sheet: Sheet1
Fig. 2B Occurrence of various spirals in rape/purslane grafts. Data were generated in three repeats
Total grafts	Total spirals	percentage(%)	1 spiral	percentage(%)	2 spirals	percentage(%)	3 spirals	percentage(%)	4 spirals	percentage(%)	5 spirals	percentage(%)	6 spirals	percentage(%)
9	7	77.8	4	44.4	0	0	0	0	3	33.3	0	0	0	0
12	10	83.3	2	16.7	3	25	2	16.7	1	8.3	1	8.3	1	8.3
14	11	78.6	3	21.4	2	14.3	1	7.1	3	21.4	1	7.1	1	7.1
FIG. 2E Occurrence of various spirals in Arabidopsis/purslane grafts
Total grafts	Total spirals	percentage(%)	1 spiral	percentage(%)	2 spirals	percentage(%)	3 spirals	percentage(%)
20	4	20	2	10	1	5	1	5
22	3	13.6	3	13.6	0	0	0	0
25	4	16	3	12	1	4	0	0
Fig. 2J Occurrence of various spirals in Nicotiana benthamiana/purslane grafts
Total grafts	Total spirals	percentage(%)	1 spiral	percentage(%)	2 spirals	percentage(%)	3 spirals	percentage(%)	4 spirals	percentage(%)	5 spirals	percentage(%)	6 spirals	percentage(%)	7 spirals	percentage(%)	8 spirals	percentage(%)	9 spirals	percentage(%)	10 spirals	percentage(%)
20	14	70	2	10	4	20	1	5	1	5	1	5	1	5	1	5	1	5	1	5	1	5
10	6	60	1	10	2	20	1	10	0	0	1	10	0	0	1	10	0	0	0	0	0	0
13	8	61.5	1	7.7	5	38.5	0	0	1	7.7	0	0	1	7.7	0	0	0	0	0	0	0	0
Fig. 2K Occurrence percentage of spiraling TEs between Arabidopsis/purslane, Nicotiana benthamiana/purslane and rape/purslane grafts
Total Arabidopsis/purslane		Arabidopsis/purslane with spiraling TEs			percentage(%)	Total Nicotiana/purslane		Nicotiana/purslane with spiraling TEs			percentage(%)	Total rape/purslane		rape/purslane with spiraling TEs			percentage(%)
50		9			18	53		31			58.4	9		7			77.8
6		39			15.4	31		21			67.7	12		10			83.3
